# Supplementary material for: Possible Effect of Human-Experimenter on Homeopathic-Like Aqueous Preparations
Source: MDPI journal article supplement (doi:10.3390/w13111475), 2021-05-24
Supplement: s1 [file s1]

## 1. Transmisson

### Results of statistical analysis of distinctions between preparations by means of Mann-Whitney U-test

“lyd” re “K”

| cm <sup>-1</sup> | Rank Sum | Rank Sum | U       | Z        | p-level  | Z        | p-level  | Valid N | Valid N | 2*1sided |
|------------------|----------|----------|---------|----------|----------|----------|----------|---------|---------|----------|
| 103.767          | 187.0000 | 278.0000 | 67.0000 | -1.88725 | 0.059127 | -1.88725 | 0.059127 | 15      | 15      | 0.061279 |
| 104.169          | 180.0000 | 285.0000 | 60.0000 | -2.17760 | 0.029437 | -2.17760 | 0.029437 | 15      | 15      | 0.029496 |
| 104.572          | 177.0000 | 288.0000 | 57.0000 | -2.30203 | 0.021334 | -2.30203 | 0.021334 | 15      | 15      | 0.020902 |
| 104.974          | 176.0000 | 289.0000 | 56.0000 | -2.34351 | 0.019104 | -2.34351 | 0.019104 | 15      | 15      | 0.018554 |
| 105.376          | 176.0000 | 289.0000 | 56.0000 | -2.34351 | 0.019104 | -2.34351 | 0.019104 | 15      | 15      | 0.018554 |
| 105.778          | 180.0000 | 285.0000 | 60.0000 | -2.17760 | 0.029437 | -2.17760 | 0.029437 | 15      | 15      | 0.029496 |
| 106.18           | 184.0000 | 281.0000 | 64.0000 | -2.01169 | 0.044254 | -2.01169 | 0.044254 | 15      | 15      | 0.045334 |
| 106.583          | 204.0000 | 261.0000 | 84.0000 | -1.18212 | 0.237157 | -1.18212 | 0.237157 | 15      | 15      | 0.249556 |

$p_{cum} = 2.83801E-10 < p_B$

“euf” re “K”

| cm <sup>-1</sup> | Rank Sum | Rank Sum | U       | Z        | p-level  | Z        | p-level  | Valid N | Valid N | 2*1sided |
|------------------|----------|----------|---------|----------|----------|----------|----------|---------|---------|----------|
| 110.202          | 185.0000 | 280.0000 | 65.0000 | -1.97021 | 0.048815 | -1.97021 | 0.048815 | 15      | 15      | 0.050222 |
| 110.605          | 183.0000 | 282.0000 | 63.0000 | -2.05316 | 0.040057 | -2.05316 | 0.040057 | 15      | 15      | 0.040840 |
| 111.007          | 179.0000 | 286.0000 | 59.0000 | -2.21908 | 0.026482 | -2.21908 | 0.026482 | 15      | 15      | 0.026354 |
| 111.409          | 181.0000 | 284.0000 | 61.0000 | -2.13612 | 0.032670 | -2.13612 | 0.032670 | 15      | 15      | 0.032944 |
| 111.811          | 186.0000 | 279.0000 | 66.0000 | -1.92873 | 0.053765 | -1.92873 | 0.053765 | 15      | 15      | 0.055530 |

$p_{cum} = 3.54575E-05 < p_B$

“anlg” re “K”

| cm <sup>-1</sup> | Rank Sum | Rank Sum | U        | Z        | p-level  | Z        | p-level  | Valid N | Valid N | 2*1sided |
|------------------|----------|----------|----------|----------|----------|----------|----------|---------|---------|----------|
| 108.996          | 195.0000 | 270.0000 | 75.00000 | -1.55543 | 0.119845 | -1.55543 | 0.119845 | 15      | 15      | 0.126147 |
| 109.398          | 185.0000 | 280.0000 | 65.00000 | -1.97021 | 0.048815 | -1.97021 | 0.048815 | 15      | 15      | 0.050222 |
| 109.8            | 178.0000 | 287.0000 | 58.00000 | -2.26055 | 0.023788 | -2.26055 | 0.023788 | 15      | 15      | 0.023496 |
| 110.202          | 174.0000 | 291.0000 | 54.00000 | -2.42647 | 0.015247 | -2.42647 | 0.015247 | 15      | 15      | 0.014519 |
| 110.605          | 167.0000 | 298.0000 | 47.00000 | -2.71681 | 0.006592 | -2.71681 | 0.006592 | 15      | 15      | 0.005704 |
| 111.007          | 166.0000 | 299.0000 | 46.00000 | -2.75829 | 0.005811 | -2.75829 | 0.005811 | 15      | 15      | 0.004940 |
| 111.409          | 179.0000 | 286.0000 | 59.00000 | -2.21908 | 0.026482 | -2.21908 | 0.026482 | 15      | 15      | 0.026354 |
| 111.811          | 191.0000 | 274.0000 | 71.0000  | -1.72134 | 0.085190 | -1.72134 | 0.085190 | 15      | 15      | 0.089195 |

$p_{cum} = 2.53328E-10 < p_B$

“All set of preparations” re “K”

| cm <sup>-1</sup> | Rank Sum | Rank Sum | U        | Z        | p-level  | Z        | p-level  | Valid N | Valid N | 2*1sided |
|------------------|----------|----------|----------|----------|----------|----------|----------|---------|---------|----------|
| 102.561          | 1276.000 | 554.0000 | 241.0000 | -1.64741 | 0.099475 | -1.64741 | 0.099475 | 45      | 15      | 0.101648 |
| 102.963          | 1268.000 | 562.0000 | 233.0000 | -1.78398 | 0.074428 | -1.78398 | 0.074428 | 45      | 15      | 0.075658 |
| 103.365          | 1246.000 | 584.0000 | 211.0000 | -2.15956 | 0.030808 | -2.15956 | 0.030808 | 45      | 15      | 0.030419 |
| 103.767          | 1241.000 | 589.0000 | 206.0000 | -2.24491 | 0.024774 | -2.24491 | 0.024774 | 45      | 15      | 0.024206 |
| 104.169          | 1236.000 | 594.0000 | 201.0000 | -2.33027 | 0.019792 | -2.33027 | 0.019792 | 45      | 15      | 0.019103 |
| 104.572          | 1232.000 | 598.0000 | 197.0000 | -2.39856 | 0.016460 | -2.39856 | 0.016460 | 45      | 15      | 0.015709 |
| 104.974          | 1237.000 | 593.0000 | 202.0000 | -2.31320 | 0.020712 | -2.31320 | 0.020712 | 45      | 15      | 0.020043 |

|                        |                 |                 |          |          |                |          |                |                |                |                 |
|------------------------|-----------------|-----------------|----------|----------|----------------|----------|----------------|----------------|----------------|-----------------|
| 105.376                | 1254.000        | 576.0000        | 219.0000 | -2.02298 | 0.043076       | -2.02298 | 0.043076       | 45             | 15             | 0.043111        |
| 105.778                | 1267.000        | 563.0000        | 232.0000 | -1.80105 | 0.071696       | -1.80105 | 0.071696       | 45             | 15             | 0.072821        |
| <b>cm<sup>-1</sup></b> | <b>Rank Sum</b> | <b>Rank Sum</b> | <b>U</b> | <b>Z</b> | <b>p-level</b> | <b>Z</b> | <b>p-level</b> | <b>Valid N</b> | <b>Valid N</b> | <b>2*1sided</b> |
| 109.398                | 1258.000        | 572.0000        | 223.0000 | -1.95470 | 0.050620       | -1.95470 | 0.050620       | 45             | 15             | 0.050936        |
| 109.8                  | 1239.000        | 591.0000        | 204.0000 | -2.27906 | 0.022664       | -2.27906 | 0.022664       | 45             | 15             | 0.022041        |
| 110.202                | 1232.000        | 598.0000        | 197.0000 | -2.39856 | 0.016460       | -2.39856 | 0.016460       | 45             | 15             | 0.015709        |
| 110.605                | 1227.000        | 603.0000        | 192.0000 | -2.48392 | 0.012995       | -2.48392 | 0.012995       | 45             | 15             | 0.012206        |
| 111.007                | 1228.000        | 602.0000        | 193.0000 | -2.46684 | 0.013631       | -2.46684 | 0.013631       | 45             | 15             | 0.012847        |
| 111.409                | 1257.000        | 573.0000        | 222.0000 | -1.97177 | 0.048637       | -1.97177 | 0.048637       | 45             | 15             | 0.048878        |
| 111.811                | 1278.000        | 552.0000        | 243.0000 | -1.61326 | 0.106688       | -1.61326 | 0.106688       | 45             | 15             | 0.109124        |

$p_{cum} = 6.347E-12 < p_B$

$p_{cum} = 7.828E-11 < p_B$

## 2. Refraction

Results of statistical analysis of distinctions between preparations  
by means of Mann-Whitney U-test

“lyd” re “K”

|                        |                 |                 |          |          |                |          |                |                |                |                 |
|------------------------|-----------------|-----------------|----------|----------|----------------|----------|----------------|----------------|----------------|-----------------|
| <b>cm<sup>-1</sup></b> | <b>Rank Sum</b> | <b>Rank Sum</b> | <b>U</b> | <b>Z</b> | <b>p-level</b> | <b>Z</b> | <b>p-level</b> | <b>Valid N</b> | <b>Valid N</b> | <b>2*1sided</b> |
| 117.844                | 276.0000        | 189.0000        | 69.0000  | 1.804296 | 0.071186       | 1.804296 | 0.071186       | 15             | 15             | 0.074204        |
| 118.246                | 284.0000        | 181.0000        | 61.0000  | 2.136120 | 0.032670       | 2.136120 | 0.032670       | 15             | 15             | 0.032944        |
| 118.649                | 286.0000        | 179.0000        | 59.0000  | 2.219077 | 0.026482       | 2.219077 | 0.026482       | 15             | 15             | 0.026354        |
| 119.051                | 292.0000        | 173.0000        | 53.0000  | 2.467945 | 0.013590       | 2.467945 | 0.013590       | 15             | 15             | 0.012799        |
| 119.453                | 293.0000        | 172.0000        | 52.0000  | 2.509423 | 0.012093       | 2.509423 | 0.012093       | 15             | 15             | 0.011256        |
| 119.855                | 293.0000        | 172.0000        | 52.0000  | 2.509423 | 0.012093       | 2.509423 | 0.012093       | 15             | 15             | 0.011256        |
| 120.257                | 293.0000        | 172.0000        | 52.0000  | 2.509423 | 0.012093       | 2.509423 | 0.012093       | 15             | 15             | 0.011256        |

$p_{cum} = 5.268E-13 < p_B$

“euf” re “K” – no

“anlg” re “K”

|                        |                 |                 |          |          |                |          |                |                |                |                 |
|------------------------|-----------------|-----------------|----------|----------|----------------|----------|----------------|----------------|----------------|-----------------|
| <b>cm<sup>-1</sup></b> | <b>Rank Sum</b> | <b>Rank Sum</b> | <b>U</b> | <b>Z</b> | <b>p-level</b> | <b>Z</b> | <b>p-level</b> | <b>Valid N</b> | <b>Valid N</b> | <b>2*1sided</b> |
| 12.8704                | 278.0000        | 187.0000        | 67.00000 | 1.887252 | 0.059127       | 1.887252 | 0.059127       | 15             | 15             | 0.061279        |
| 13.2726                | 283.0000        | 182.0000        | 62.00000 | 2.094642 | 0.036204       | 2.094642 | 0.036204       | 15             | 15             | 0.036718        |
| 13.6748                | 282.0000        | 183.0000        | 63.00000 | 2.053164 | 0.040057       | 2.053164 | 0.040057       | 15             | 15             | 0.040840        |
| 14.077                 | 283.0000        | 182.0000        | 62.00000 | 2.094642 | 0.036204       | 2.094642 | 0.036204       | 15             | 15             | 0.036718        |
| 14.4792                | 286.0000        | 179.0000        | 59.00000 | 2.219077 | 0.026482       | 2.219077 | 0.026482       | 15             | 15             | 0.026354        |
| 14.8814                | 286.0000        | 179.0000        | 59.00000 | 2.219077 | 0.026482       | 2.219077 | 0.026482       | 15             | 15             | 0.026354        |
| 15.2836                | 284.0000        | 181.0000        | 61.00000 | 2.136120 | 0.032670       | 2.136120 | 0.032670       | 15             | 15             | 0.032944        |
| 15.6858                | 282.0000        | 183.0000        | 63.00000 | 2.053164 | 0.040057       | 2.053164 | 0.040057       | 15             | 15             | 0.040840        |
| 16.088                 | 283.0000        | 182.0000        | 62.00000 | 2.094642 | 0.036204       | 2.094642 | 0.036204       | 15             | 15             | 0.036718        |
| 16.4901                | 283.0000        | 182.0000        | 62.00000 | 2.094642 | 0.036204       | 2.094642 | 0.036204       | 15             | 15             | 0.036718        |
| 16.8923                | 283.5000        | 181.5000        | 61.50000 | 2.115381 | 0.034398       | 2.115617 | 0.034378       | 15             | 15             | 0.032944        |
| 17.2945                | 285.0000        | 180.0000        | 60.00000 | 2.177599 | 0.029437       | 2.177599 | 0.029437       | 15             | 15             | 0.029496        |
| 17.6967                | 285.0000        | 180.0000        | 60.00000 | 2.177599 | 0.029437       | 2.177599 | 0.029437       | 15             | 15             | 0.029496        |

|         |          |          |          |          |          |          |          |    |    |          |
|---------|----------|----------|----------|----------|----------|----------|----------|----|----|----------|
| 18.0989 | 285.0000 | 180.0000 | 60.00000 | 2.177599 | 0.029437 | 2.177599 | 0.029437 | 15 | 15 | 0.029496 |
| 18.5011 | 285.0000 | 180.0000 | 60.00000 | 2.177599 | 0.029437 | 2.177599 | 0.029437 | 15 | 15 | 0.029496 |
| 18.9033 | 285.0000 | 180.0000 | 60.00000 | 2.177599 | 0.029437 | 2.177599 | 0.029437 | 15 | 15 | 0.029496 |
| 19.3055 | 286.0000 | 179.0000 | 59.00000 | 2.219077 | 0.026482 | 2.219077 | 0.026482 | 15 | 15 | 0.026354 |
| 19.7077 | 285.0000 | 180.0000 | 60.00000 | 2.177599 | 0.029437 | 2.177599 | 0.029437 | 15 | 15 | 0.029496 |
| 20.1099 | 285.0000 | 180.0000 | 60.00000 | 2.177599 | 0.029437 | 2.177599 | 0.029437 | 15 | 15 | 0.029496 |
| 20.5121 | 284.0000 | 181.0000 | 61.00000 | 2.136120 | 0.032670 | 2.136120 | 0.032670 | 15 | 15 | 0.032944 |
| 20.9143 | 284.0000 | 181.0000 | 61.00000 | 2.136120 | 0.032670 | 2.136120 | 0.032670 | 15 | 15 | 0.032944 |
| 21.3165 | 284.0000 | 181.0000 | 61.00000 | 2.136120 | 0.032670 | 2.136120 | 0.032670 | 15 | 15 | 0.032944 |
| 21.7187 | 284.0000 | 181.0000 | 61.00000 | 2.136120 | 0.032670 | 2.136120 | 0.032670 | 15 | 15 | 0.032944 |
| 22.1209 | 285.0000 | 180.0000 | 60.00000 | 2.177599 | 0.029437 | 2.177599 | 0.029437 | 15 | 15 | 0.029496 |
| 22.5231 | 284.0000 | 181.0000 | 61.00000 | 2.136120 | 0.032670 | 2.136120 | 0.032670 | 15 | 15 | 0.032944 |
| 22.9253 | 284.0000 | 181.0000 | 61.00000 | 2.136120 | 0.032670 | 2.136120 | 0.032670 | 15 | 15 | 0.032944 |
| 23.3275 | 284.0000 | 181.0000 | 61.00000 | 2.136120 | 0.032670 | 2.136120 | 0.032670 | 15 | 15 | 0.032944 |
| 23.7297 | 285.0000 | 180.0000 | 60.00000 | 2.177599 | 0.029437 | 2.177599 | 0.029437 | 15 | 15 | 0.029496 |
| 24.1319 | 285.0000 | 180.0000 | 60.00000 | 2.177599 | 0.029437 | 2.177599 | 0.029437 | 15 | 15 | 0.029496 |
| 24.5341 | 285.0000 | 180.0000 | 60.00000 | 2.177599 | 0.029437 | 2.177599 | 0.029437 | 15 | 15 | 0.029496 |
| 24.9363 | 285.0000 | 180.0000 | 60.00000 | 2.177599 | 0.029437 | 2.177599 | 0.029437 | 15 | 15 | 0.029496 |
| 25.3385 | 285.0000 | 180.0000 | 60.00000 | 2.177599 | 0.029437 | 2.177599 | 0.029437 | 15 | 15 | 0.029496 |
| 25.7407 | 285.0000 | 180.0000 | 60.00000 | 2.177599 | 0.029437 | 2.177599 | 0.029437 | 15 | 15 | 0.029496 |
| 26.1429 | 285.0000 | 180.0000 | 60.00000 | 2.177599 | 0.029437 | 2.177841 | 0.029419 | 15 | 15 | 0.029496 |
| 26.5451 | 285.0000 | 180.0000 | 60.00000 | 2.177599 | 0.029437 | 2.177599 | 0.029437 | 15 | 15 | 0.029496 |
| 26.9473 | 285.0000 | 180.0000 | 60.00000 | 2.177599 | 0.029437 | 2.177599 | 0.029437 | 15 | 15 | 0.029496 |
| 27.3495 | 285.0000 | 180.0000 | 60.00000 | 2.177599 | 0.029437 | 2.177599 | 0.029437 | 15 | 15 | 0.029496 |
| 27.7517 | 284.0000 | 181.0000 | 61.00000 | 2.136120 | 0.032670 | 2.136120 | 0.032670 | 15 | 15 | 0.032944 |
| 28.1539 | 284.0000 | 181.0000 | 61.00000 | 2.136120 | 0.032670 | 2.136120 | 0.032670 | 15 | 15 | 0.032944 |
| 28.5561 | 284.0000 | 181.0000 | 61.00000 | 2.136120 | 0.032670 | 2.136120 | 0.032670 | 15 | 15 | 0.032944 |
| 28.9583 | 284.0000 | 181.0000 | 61.00000 | 2.136120 | 0.032670 | 2.136120 | 0.032670 | 15 | 15 | 0.032944 |
| 29.3605 | 284.0000 | 181.0000 | 61.00000 | 2.136120 | 0.032670 | 2.136120 | 0.032670 | 15 | 15 | 0.032944 |
| 29.7627 | 284.0000 | 181.0000 | 61.00000 | 2.136120 | 0.032670 | 2.136120 | 0.032670 | 15 | 15 | 0.032944 |
| 30.1649 | 284.0000 | 181.0000 | 61.00000 | 2.136120 | 0.032670 | 2.136120 | 0.032670 | 15 | 15 | 0.032944 |
| 30.5671 | 284.0000 | 181.0000 | 61.00000 | 2.136120 | 0.032670 | 2.136120 | 0.032670 | 15 | 15 | 0.032944 |
| 30.9693 | 284.0000 | 181.0000 | 61.00000 | 2.136120 | 0.032670 | 2.136120 | 0.032670 | 15 | 15 | 0.032944 |
| 31.3715 | 284.0000 | 181.0000 | 61.00000 | 2.136120 | 0.032670 | 2.136120 | 0.032670 | 15 | 15 | 0.032944 |
| 31.7737 | 284.0000 | 181.0000 | 61.00000 | 2.136120 | 0.032670 | 2.136120 | 0.032670 | 15 | 15 | 0.032944 |
| 32.1759 | 284.0000 | 181.0000 | 61.00000 | 2.136120 | 0.032670 | 2.136120 | 0.032670 | 15 | 15 | 0.032944 |
| 32.5781 | 284.5000 | 180.5000 | 60.50000 | 2.156860 | 0.031017 | 2.157099 | 0.030999 | 15 | 15 | 0.029496 |
| 32.9803 | 285.0000 | 180.0000 | 60.00000 | 2.177599 | 0.029437 | 2.177599 | 0.029437 | 15 | 15 | 0.029496 |
| 33.3825 | 284.5000 | 180.5000 | 60.50000 | 2.156860 | 0.031017 | 2.157099 | 0.030999 | 15 | 15 | 0.029496 |
| 33.7847 | 284.5000 | 180.5000 | 60.50000 | 2.156860 | 0.031017 | 2.157099 | 0.030999 | 15 | 15 | 0.029496 |
| 34.1869 | 284.0000 | 181.0000 | 61.00000 | 2.136120 | 0.032670 | 2.136120 | 0.032670 | 15 | 15 | 0.032944 |
| 34.5891 | 284.0000 | 181.0000 | 61.00000 | 2.136120 | 0.032670 | 2.136120 | 0.032670 | 15 | 15 | 0.032944 |
| 34.9913 | 284.0000 | 181.0000 | 61.00000 | 2.136120 | 0.032670 | 2.136120 | 0.032670 | 15 | 15 | 0.032944 |
| 35.3935 | 284.0000 | 181.0000 | 61.00000 | 2.136120 | 0.032670 | 2.136120 | 0.032670 | 15 | 15 | 0.032944 |
| 35.7957 | 284.0000 | 181.0000 | 61.00000 | 2.136120 | 0.032670 | 2.136120 | 0.032670 | 15 | 15 | 0.032944 |

|         |                 |                 |          |          |                |          |                |                |                |                 |
|---------|-----------------|-----------------|----------|----------|----------------|----------|----------------|----------------|----------------|-----------------|
| 36.1979 | 284.0000        | 181.0000        | 61.00000 | 2.136120 | 0.032670       | 2.136120 | 0.032670       | 15             | 15             | 0.032944        |
| 36.6001 | 284.0000        | 181.0000        | 61.00000 | 2.136120 | 0.032670       | 2.136120 | 0.032670       | 15             | 15             | 0.032944        |
| 37.0023 | 284.0000        | 181.0000        | 61.00000 | 2.136120 | 0.032670       | 2.136120 | 0.032670       | 15             | 15             | 0.032944        |
| 37.4045 | 282.0000        | 183.0000        | 63.00000 | 2.053164 | 0.040057       | 2.053164 | 0.040057       | 15             | 15             | 0.040840        |
| 37.8067 | 281.0000        | 184.0000        | 64.00000 | 2.011686 | 0.044254       | 2.011686 | 0.044254       | 15             | 15             | 0.045334        |
|         | <b>Rank Sum</b> | <b>Rank Sum</b> | <b>U</b> | <b>Z</b> | <b>p-level</b> | <b>Z</b> | <b>p-level</b> | <b>Valid N</b> | <b>Valid N</b> | <b>2*1sided</b> |
| 118.649 | 275.0000        | 190.0000        | 70.00000 | 1.762818 | 0.077932       | 1.762818 | 0.077932       | 15             | 15             | 0.081429        |
| 119.051 | 281.0000        | 184.0000        | 64.00000 | 2.011686 | 0.044254       | 2.011686 | 0.044254       | 15             | 15             | 0.045334        |
| 119.453 | 285.0000        | 180.0000        | 60.00000 | 2.177599 | 0.029437       | 2.177599 | 0.029437       | 15             | 15             | 0.029496        |
| 119.855 | 285.0000        | 180.0000        | 60.00000 | 2.177599 | 0.029437       | 2.177599 | 0.029437       | 15             | 15             | 0.029496        |
| 120.257 | 286.0000        | 179.0000        | 59.00000 | 2.219077 | 0.026482       | 2.219077 | 0.026482       | 15             | 15             | 0.026354        |

$p_{cum} = 2.302E-93 < p_B$

$p_{cum} = 1.039E-06 < p_B$

“All set of preparations” *re* “K”

|                        |                 |                 |          |          |                |          |                |                |                |                 |
|------------------------|-----------------|-----------------|----------|----------|----------------|----------|----------------|----------------|----------------|-----------------|
| <b>cm<sup>-1</sup></b> | <b>Rank Sum</b> | <b>Rank Sum</b> | <b>U</b> | <b>Z</b> | <b>p-level</b> | <b>Z</b> | <b>p-level</b> | <b>Valid N</b> | <b>Valid N</b> | <b>2*1sided</b> |
| 16.088                 | 1485.000        | 345.0000        | 225.0000 | 1.920553 | 0.054789       | 1.920553 | 0.054789       | 45             | 15             | 0.055263        |
| 16.4901                | 1488.000        | 342.0000        | 222.0000 | 1.971768 | 0.048637       | 1.971768 | 0.048637       | 45             | 15             | 0.048878        |
| 16.8923                | 1488.500        | 341.5000        | 221.5000 | 1.980304 | 0.047670       | 1.980331 | 0.047667       | 45             | 15             | 0.046889        |
| 17.2945                | 1489.000        | 341.0000        | 221.0000 | 1.988840 | 0.046720       | 1.988840 | 0.046720       | 45             | 15             | 0.046889        |
| 17.6967                | 1486.000        | 344.0000        | 224.0000 | 1.937625 | 0.052670       | 1.937625 | 0.052670       | 45             | 15             | 0.053063        |
|                        | <b>Rank Sum</b> | <b>Rank Sum</b> | <b>U</b> | <b>Z</b> | <b>p-level</b> | <b>Z</b> | <b>p-level</b> | <b>Valid N</b> | <b>Valid N</b> | <b>2*1sided</b> |
| 118.649                | 1476.000        | 354.0000        | 234.0000 | 1.766909 | 0.077244       | 1.766909 | 0.077244       | 45             | 15             | 0.078583        |
| 119.051                | 1491.000        | 339.0000        | 219.0000 | 2.022983 | 0.043076       | 2.023011 | 0.043073       | 45             | 15             | 0.043111        |
| 119.453                | 1493.000        | 337.0000        | 217.0000 | 2.057126 | 0.039675       | 2.057126 | 0.039675       | 45             | 15             | 0.039587        |
| 119.855                | 1488.000        | 342.0000        | 222.0000 | 1.971768 | 0.048637       | 1.971768 | 0.048637       | 45             | 15             | 0.048878        |
| 120.257                | 1492.000        | 338.0000        | 218.0000 | 2.040054 | 0.041346       | 2.040054 | 0.041346       | 45             | 15             | 0.041318        |

$p_{cum} = 1.075E-4 < p_B$

$p_{cum} = 3.447E-06 < p_B$
