# Supplementary material for: Possible Effect of Human-Experimenter on Homeopathic-Like Aqueous Preparations
Source: MDPI journal article supplement (doi:10.3390/w13111475), 2021-05-24
Supplement: s1 [file s1]

**1. Automatically reported spectral parameters of dynamic light scattering, experiment 03.03.2018 (selected Size in limits of 4-1765 nm)**

| Sample No. | Preparation | % Intensity | Size, nm | St Dev (Size), nm |
|------------|-------------|-------------|----------|-------------------|
| 53         | euf         | 37.7        | 424.7    | 30.11             |
| 6          | anlg        | 32          | 528.6    | 86.15             |
| 11         | euf         | 48.1        | 691.6    | 71.21             |
| 1          | anlg        | 11.5        | 358.1    | 27.06             |
| 49         | hc          | 57.7        | 894.8    | 50.56             |
| 30         | euf         | 5.3         | 239.6    | 15.21             |
| 35         | hc          | 21.4        | 324.5    | 25.93             |
| 51         | hc          |             |          |                   |
| 22         | lyd         | 9.2         | 1732     | 230.4             |
| 60         | anlg        | 7.7         | 125.7    | 5.138             |
| 45         | hc          | 22.8        | 427.1    | 29.76             |
| 41         | lyd         | 46.5        | 91.08    | 3.317             |
| 46         | lyd         |             |          |                   |
| 59         | euf         | 38.3        | 1033     | 119.2             |
| 34         | hc          |             |          |                   |
| 2          | lyd         | 79.1        | 393.5    | 14.04             |
| 5          | hc          |             |          |                   |
| 24         | anlg        | 33.1        | 358.3    | 22.7              |
| 15         | euf         | 36.1        | 274.8    | 11.3              |
| 8          | anlg        |             |          |                   |
| 4          | hc          | 36.7        | 1143     | 144.2             |
| 39         | euf         |             |          |                   |
| 47         | anlg        | 26.2        | 482.7    | 59.49             |
| 29         | anlg        |             |          |                   |
| 57         | hc          | 64.1        | 978.9    | 85.22             |
| 10         | lyd         | 100         | 131.8    | 4.73              |
| 25         | anlg        | 34.3        | 267.4    | 20.96             |
| 44         | euf         | 15.2        | 264      | 13.91             |
| 27         | anlg        | 9.9         | 324.8    | 24.34             |
| 33         | lyd         | 20.6        | 229      | 11.45             |
| 31         | anlg        | 23.8        | 507.5    | 55.09             |
| 48         | hc          |             |          |                   |
| 19         | lyd         |             |          |                   |
| 14         | hc          |             |          |                   |
| 37         | lyd         | 13.3        | 175.2    | 16.76             |
| 54         | euf         |             |          |                   |
| 17         | lyd         |             |          |                   |
| 36         | euf         | 10.4        | 171.2    | 4.7               |
| 23         | euf         | 5.6         | 293.2    | 11.69             |
| 28         | anlg        | 100         | 169.1    | 0                 |
| 38         | euf         |             |          |                   |
| 20         | lyd         | 21.5        | 133.8    | 3.984             |
| 40         | euf         | 47          | 344.2    | 16.91             |

|    |      |      |       |       |
|----|------|------|-------|-------|
| 42 | lyd  |      |       |       |
| 55 | lyd  |      |       |       |
| 7  | lyd  | 5.5  | 125   | 13.36 |
| 21 | hc   | 18.3 | 202.9 | 7.392 |
| 13 | euf  | 24.7 | 283   | 20.43 |
| 16 | anlg | 42.4 | 481.3 | 28.14 |
| 32 | hc   | 36.4 | 480   | 36.4  |
| 26 | lyd  | 18.4 | 4.676 | 0.565 |
| 9  | hc   | 57.4 | 487.8 | 112.7 |
| 50 | hc   | 53.3 | 312.7 | 20.65 |
| 18 | lyd  |      |       |       |
| 58 | anlg | 39.3 | 909.1 | 73.36 |
| 12 | anlg | 100  | 316.5 | 11.24 |
| 3  | anlg |      |       |       |
| 52 | hc   | 100  | 116.6 | 2.55  |
| 43 | euf  | 25.5 | 398.8 | 27.3  |
| 56 | euf  | 60.6 | 908.7 | 68.58 |
| K  | K    | 100  | 9.174 | 0     |
| K  | K    | 100  | 152.7 | 6.7   |
| K  | K    | 100  | 290.1 | 11.08 |
| K  | K    | 100  | 121.5 | 4.42  |
| K  | K    | 100  | 203.3 | 7.386 |
| K  | K    | 100  | 238.7 | 7.699 |
| K  | K    | 100  | 186.9 | 6.843 |
| K  | K    | 56.6 | 636.8 | 36.25 |
| K  | K    | 83.7 | 70.55 | 0     |
| K  | K    |      |       |       |
| K  | K    | 54.8 | 1765  | 255.4 |
| K  | K    |      |       |       |
| K  | K    | 100  | 222.1 | 7.039 |
| K  | K    | 39.4 | 419.7 | 25.95 |
| K  | K    |      |       |       |

Note:

Yellow marks – samples excluded due to an absence of refraction peaks or Size lying out of accepted limits 4-1765 nm.

## 2. Results of statistical analysis of distinctions between preparations by means of Mann-Whitney U-test

“lyd” *re* “hc”

|                   | Rank Sum | Rank Sum | U    | Z        | p-level  | Z        | p-level  | Valid N | Valid N | 2*1sided |
|-------------------|----------|----------|------|----------|----------|----------|----------|---------|---------|----------|
| % Intensity       | 72       | 117.5    | 27.5 | -1.42887 | 0.153043 | -1.42950 | 0.152863 | 9       | 10      | 0.156401 |
| Size, nm          | 65       | 125      | 20   | -2.04124 | 0.041228 | -2.04124 | 0.041228 | 9       | 10      | 0.043474 |
| St Dev (Size), nm | 66       | 124      | 21   | -1.95959 | 0.050044 | -1.95959 | 0.050044 | 9       | 10      | 0.053476 |

“anlg” re “hc”

|                   | Rank Sum | Rank Sum | U  | Z        | p-level  | Z        | p-level  | Valid N | Valid N | 2*1sided |
|-------------------|----------|----------|----|----------|----------|----------|----------|---------|---------|----------|
| % Intensity       | 122      | 131      | 44 | -1.05501 | 0.291422 | -1.05620 | 0.290877 | 12      | 10      | 0.313618 |
| Size, nm          | 131      | 122      | 53 | -0.46157 | 0.644393 | -0.46157 | 0.644393 | 12      | 10      | 0.674397 |
| St Dev (Size), nm | 127      | 126      | 49 | -0.72532 | 0.468257 | -0.72532 | 0.468257 | 12      | 10      | 0.496507 |

“euf” re “hc”

|                   | Rank Sum | Rank Sum | U  | Z        | p-level  | Z        | p-level  | Valid N | Valid N | 2*1sided |
|-------------------|----------|----------|----|----------|----------|----------|----------|---------|---------|----------|
| % Intensity       | 115      | 138      | 37 | -1.51658 | 0.129375 | -1.51658 | 0.129375 | 12      | 10      | 0.140237 |
| Size, nm          | 125      | 128      | 47 | -0.85719 | 0.391338 | -0.85719 | 0.391338 | 12      | 10      | 0.417582 |
| St Dev (Size), nm | 123      | 130      | 45 | -0.98907 | 0.322629 | -0.98907 | 0.322629 | 12      | 10      | 0.346279 |

“euf” re “K”

|                   | Rank Sum | Rank Sum | U  | Z        | p-level  | Z        | p-level  | Valid N | Valid N | 2*1sided |
|-------------------|----------|----------|----|----------|----------|----------|----------|---------|---------|----------|
| % Intensity       | 83       | 217      | 5  | -3.86825 | 0.000110 | -3.94088 | 0.000081 | 12      | 12      | 0.000014 |
| Size, nm          | 184      | 116      | 38 | 1.96299  | 0.049648 | 1.96299  | 0.049648 | 12      | 12      | 0.051865 |
| St Dev (Size), nm | 188      | 112      | 34 | 2.19393  | 0.028241 | 2.19441  | 0.028207 | 12      | 12      | 0.028421 |

“anlg” re “K”

|                   | Rank Sum | Rank Sum | U  | Z        | p-level  | Z        | p-level  | Valid N | Valid N | 2*1sided |
|-------------------|----------|----------|----|----------|----------|----------|----------|---------|---------|----------|
| % Intensity       | 95       | 205      | 17 | -3.17543 | 0.001496 | -3.29585 | 0.000981 | 12      | 12      | 0.000858 |
| Size, nm          | 180      | 120      | 42 | 1.73205  | 0.083265 | 1.73205  | 0.083265 | 12      | 12      | 0.088734 |
| St Dev (Size), nm | 182      | 118      | 40 | 1.84752  | 0.064673 | 1.84913  | 0.064440 | 12      | 12      | 0.068361 |

“hc” re “K”

|                   | Rank Sum | Rank Sum | U  | Z        | p-level  | Z        | p-level  | Valid N | Valid N | 2*1sided |
|-------------------|----------|----------|----|----------|----------|----------|----------|---------|---------|----------|
| % Intensity       | 73       | 180      | 18 | -2.76940 | 0.005616 | -2.86828 | 0.004127 | 10      | 12      | 0.004429 |
| Size, nm          | 143      | 110      | 32 | 1.84627  | 0.064855 | 1.84627  | 0.064855 | 10      | 12      | 0.069151 |
| St Dev (Size), nm | 147      | 106      | 28 | 2.11002  | 0.034858 | 2.11061  | 0.034806 | 10      | 12      | 0.035828 |

“lyd” re “K”

|                   | Rank Sum | Rank Sum | U  | Z        | p-level  | Z        | p-level  | Valid N | Valid N | 2*1sided |
|-------------------|----------|----------|----|----------|----------|----------|----------|---------|---------|----------|
| % Intensity       | 57       | 174      | 12 | -2.98481 | 0.002838 | -3.10837 | 0.001881 | 9       | 12      | 0.001803 |
| Size, nm          | 87       | 144      | 42 | -0.85280 | 0.393769 | -0.85280 | 0.393769 | 9       | 12      | 0.422107 |
| St Dev (Size), nm | 101      | 130      | 52 | 0.14213  | 0.886974 | 0.14218  | 0.886938 | 9       | 12      | 0.917007 |

Red text –  $p < p_B = 0.0125$
