# Supplementary material for: Possible Effect of Human-Experimenter on Homeopathic-Like Aqueous Preparations
Source: MDPI journal article supplement (doi:10.3390/w13111475), 2021-05-24
Supplement: s1 [file s1]

## 1. Transmisson

### Results of statistical analysis of distinctions between preparations by means of Mann-Whitney U-test

“lyd” *re* “hc” – no

“lyd” *re* “K”

| cm <sup>-1</sup> | RankSum  | RankSum  | U        | Z        | p-level  | Z        | p-level  | Valid N | Valid N | 2*1sided |
|------------------|----------|----------|----------|----------|----------|----------|----------|---------|---------|----------|
| 53.8946          | 116.0000 | 184.0000 | 38.00000 | -1.96299 | 0.049648 | -1.96299 | 0.049648 | 12      | 12      | 0.051865 |
| 54.2968          | 114.0000 | 186.0000 | 36.00000 | -2.07846 | 0.037668 | -2.07846 | 0.037668 | 12      | 12      | 0.038721 |
| 54.699           | 113.0000 | 187.0000 | 35.00000 | -2.13620 | 0.032664 | -2.13620 | 0.032664 | 12      | 12      | 0.033241 |
| 55.1012          | 110.0000 | 190.0000 | 32.00000 | -2.30940 | 0.020922 | -2.30940 | 0.020922 | 12      | 12      | 0.020489 |
| 55.5034          | 110.0000 | 190.0000 | 32.00000 | -2.30940 | 0.020922 | -2.30940 | 0.020922 | 12      | 12      | 0.020489 |
| 55.9056          | 109.0000 | 191.0000 | 31.00000 | -2.36714 | 0.017927 | -2.36714 | 0.017927 | 12      | 12      | 0.017271 |
| 56.3078          | 110.0000 | 190.0000 | 32.00000 | -2.30940 | 0.020922 | -2.30940 | 0.020922 | 12      | 12      | 0.020489 |
| 56.71            | 111.0000 | 189.0000 | 33.00000 | -2.25167 | 0.024344 | -2.25167 | 0.024344 | 12      | 12      | 0.024184 |
| 57.1122          | 111.0000 | 189.0000 | 33.00000 | -2.25167 | 0.024344 | -2.25167 | 0.024344 | 12      | 12      | 0.024184 |
| 57.5144          | 112.0000 | 188.0000 | 34.00000 | -2.19393 | 0.028241 | -2.19393 | 0.028241 | 12      | 12      | 0.028421 |
| 57.9166          | 112.0000 | 188.0000 | 34.00000 | -2.19393 | 0.028241 | -2.19393 | 0.028241 | 12      | 12      | 0.028421 |
| 58.3188          | 111.0000 | 189.0000 | 33.00000 | -2.25167 | 0.024344 | -2.25167 | 0.024344 | 12      | 12      | 0.024184 |
| 58.721           | 113.0000 | 187.0000 | 35.00000 | -2.13620 | 0.032664 | -2.13620 | 0.032664 | 12      | 12      | 0.033241 |
| 59.1232          | 116.0000 | 184.0000 | 38.00000 | -1.96299 | 0.049648 | -1.96299 | 0.049648 | 12      | 12      | 0.051865 |

$p_{cum} = 7.262E-20 < p_B$

“euf” *re* “hc” – no

“euf” *re* “K” – no

“anlg” *re* “hc” – no

“anlg” *re* “K”

| cm <sup>-1</sup> | RankSum  | RankSum  | U        | Z        | p-level  | Z        | p-level  | Valid N | Valid N | 2*1sided |
|------------------|----------|----------|----------|----------|----------|----------|----------|---------|---------|----------|
| 105.778          | 189.0000 | 111.0000 | 33.00000 | 2.251666 | 0.024344 | 2.251666 | 0.024344 | 12      | 12      | 0.024184 |
| 106.18           | 195.0000 | 105.0000 | 27.00000 | 2.598076 | 0.009375 | 2.598076 | 0.009375 | 12      | 12      | 0.008293 |
| 106.583          | 198.0000 | 102.0000 | 24.00000 | 2.771281 | 0.005584 | 2.771281 | 0.005584 | 12      | 12      | 0.004513 |
| 106.985          | 197.0000 | 103.0000 | 25.00000 | 2.713546 | 0.006657 | 2.713546 | 0.006657 | 12      | 12      | 0.005560 |
| 107.387          | 191.0000 | 109.0000 | 31.00000 | 2.367136 | 0.017927 | 2.367136 | 0.017927 | 12      | 12      | 0.017271 |

$p_{cum} = 8.692E-11 < p_B$

“hc” *re* “K” – no

“All set of preparations” *re* “K”

| cm <sup>-1</sup> | RankSum  | RankSum  | U        | Z        | p-level  | Z        | p-level  | Valid N | Valid N | 2*1sided |
|------------------|----------|----------|----------|----------|----------|----------|----------|---------|---------|----------|
| 55.1012          | 798.0000 | 378.0000 | 132.0000 | -2.00000 | 0.045501 | -2.00000 | 0.045501 | 36      | 12      | 0.045790 |
| 55.5034          | 795.0000 | 381.0000 | 129.0000 | -2.07143 | 0.038320 | -2.07143 | 0.038320 | 36      | 12      | 0.038260 |
| 55.9056          | 791.0000 | 385.0000 | 125.0000 | -2.16667 | 0.030261 | -2.16667 | 0.030261 | 36      | 12      | 0.029836 |
| 56.3078          | 793.0000 | 383.0000 | 127.0000 | -2.11905 | 0.034087 | -2.11905 | 0.034087 | 36      | 12      | 0.033831 |
| 56.71            | 795.0000 | 381.0000 | 129.0000 | -2.07143 | 0.038320 | -2.07143 | 0.038320 | 36      | 12      | 0.038260 |

|         |          |          |          |          |          |          |          |    |    |          |
|---------|----------|----------|----------|----------|----------|----------|----------|----|----|----------|
| 57.1122 | 796.0000 | 380.0000 | 130.0000 | -2.04762 | 0.040598 | -2.04762 | 0.040598 | 36 | 12 | 0.040647 |
| 57.5144 | 796.0000 | 380.0000 | 130.0000 | -2.04762 | 0.040598 | -2.04762 | 0.040598 | 36 | 12 | 0.040647 |
| 57.9166 | 797.0000 | 379.0000 | 131.0000 | -2.02381 | 0.042991 | -2.02381 | 0.042991 | 36 | 12 | 0.043156 |
| 58.3188 | 795.0000 | 381.0000 | 129.0000 | -2.07143 | 0.038320 | -2.07148 | 0.038314 | 36 | 12 | 0.038260 |
| 58.721  | 798.0000 | 378.0000 | 132.0000 | -2.00000 | 0.045501 | -2.00000 | 0.045501 | 36 | 12 | 0.045790 |

$$p_{\text{cum}} = 8.451\text{E-}15 < p_B$$

“All set of preparations” *re* “hc” – no.

## 2. Refraction

**Results of statistical analysis of distinctions between preparations by means of Mann-Whitney U-test**

“lyd” *re* “hc” – no

“lyd” *re* “K” – no

“euf” *re* “hc” – no

“euf” *re* “K”

| cm <sup>-1</sup> | RankSum  | RankSum  | U        | Z        | p-level  | Z        | p-level  | Valid N | Valid N | 2*1sided |
|------------------|----------|----------|----------|----------|----------|----------|----------|---------|---------|----------|
| 107.387          | 113.0000 | 187.0000 | 35.00000 | -2.13620 | 0.032664 | -2.13620 | 0.032664 | 12      | 12      | 0.033241 |
| 107.789          | 112.0000 | 188.0000 | 34.00000 | -2.19393 | 0.028241 | -2.19393 | 0.028241 | 12      | 12      | 0.028421 |
| 108.191          | 110.0000 | 190.0000 | 32.00000 | -2.30940 | 0.020922 | -2.30940 | 0.020922 | 12      | 12      | 0.020489 |

$$p_{\text{cum}} = 1.93568\text{E-}05 < p_B$$

“anlg” *re* “hc” – no

“anlg” *re* “K”

| cm <sup>-1</sup> | RankSum  | RankSum  | U        | Z        | p-level  | Z        | p-level  | Valid N | Valid N | 2*1sided |
|------------------|----------|----------|----------|----------|----------|----------|----------|---------|---------|----------|
| 106.583          | 114.0000 | 186.0000 | 36.00000 | -2.07846 | 0.037668 | -2.07846 | 0.037668 | 12      | 12      | 0.038721 |
| 106.985          | 107.0000 | 193.0000 | 29.00000 | -2.48261 | 0.013043 | -2.48261 | 0.013043 | 12      | 12      | 0.012094 |
| 107.387          | 105.0000 | 195.0000 | 27.00000 | -2.59808 | 0.009375 | -2.59808 | 0.009375 | 12      | 12      | 0.008293 |
| 107.789          | 101.0000 | 199.0000 | 23.00000 | -2.82902 | 0.004669 | -2.82902 | 0.004669 | 12      | 12      | 0.003637 |
| 108.191          | 100.0000 | 200.0000 | 22.00000 | -2.88675 | 0.003893 | -2.88675 | 0.003893 | 12      | 12      | 0.002914 |
| 108.594          | 102.0000 | 198.0000 | 24.00000 | -2.77128 | 0.005584 | -2.77128 | 0.005584 | 12      | 12      | 0.004513 |
| 108.996          | 107.0000 | 193.0000 | 29.00000 | -2.48261 | 0.013043 | -2.48261 | 0.013043 | 12      | 12      | 0.012094 |
| 109.398          | 109.0000 | 191.0000 | 31.00000 | -2.36714 | 0.017927 | -2.36714 | 0.017927 | 12      | 12      | 0.017271 |
| 109.8            | 108.0000 | 192.0000 | 30.00000 | -2.42487 | 0.015314 | -2.42487 | 0.015314 | 12      | 12      | 0.014493 |
| 110.202          | 112.0000 | 188.0000 | 34.00000 | -2.19393 | 0.028241 | -2.19393 | 0.028241 | 12      | 12      | 0.028421 |
| 110.605          | 113.0000 | 187.0000 | 35.00000 | -2.13620 | 0.032664 | -2.13620 | 0.032664 | 12      | 12      | 0.033241 |
| 111.007          | 112.0000 | 188.0000 | 34.00000 | -2.19393 | 0.028241 | -2.19393 | 0.028241 | 12      | 12      | 0.028421 |
| 111.409          | 108.0000 | 192.0000 | 30.00000 | -2.42487 | 0.015314 | -2.42487 | 0.015314 | 12      | 12      | 0.014493 |
| 111.811          | 111.0000 | 189.0000 | 33.00000 | -2.25167 | 0.024344 | -2.25167 | 0.024344 | 12      | 12      | 0.024184 |
| 112.213          | 111.0000 | 189.0000 | 33.00000 | -2.25167 | 0.024344 | -2.25167 | 0.024344 | 12      | 12      | 0.024184 |
| 112.616          | 108.0000 | 192.0000 | 30.00000 | -2.42487 | 0.015314 | -2.42487 | 0.015314 | 12      | 12      | 0.014493 |

|         |          |          |          |          |          |          |          |    |    |          |
|---------|----------|----------|----------|----------|----------|----------|----------|----|----|----------|
| 113.018 | 108.0000 | 192.0000 | 30.00000 | -2.42487 | 0.015314 | -2.42487 | 0.015314 | 12 | 12 | 0.014493 |
| 113.42  | 109.0000 | 191.0000 | 31.00000 | -2.36714 | 0.017927 | -2.36714 | 0.017927 | 12 | 12 | 0.017271 |
| 113.822 | 109.0000 | 191.0000 | 31.00000 | -2.36714 | 0.017927 | -2.36714 | 0.017927 | 12 | 12 | 0.017271 |
| 114.224 | 108.0000 | 192.0000 | 30.00000 | -2.42487 | 0.015314 | -2.42487 | 0.015314 | 12 | 12 | 0.014493 |
| 114.627 | 108.0000 | 192.0000 | 30.00000 | -2.42487 | 0.015314 | -2.42487 | 0.015314 | 12 | 12 | 0.014493 |
| 115.029 | 110.0000 | 190.0000 | 32.00000 | -2.30940 | 0.020922 | -2.30940 | 0.020922 | 12 | 12 | 0.020489 |
| 115.431 | 115.0000 | 185.0000 | 37.00000 | -2.02073 | 0.043309 | -2.02073 | 0.043309 | 12 | 12 | 0.044902 |
| 115.833 | 115.0000 | 185.0000 | 37.00000 | -2.02073 | 0.043309 | -2.02073 | 0.043309 | 12 | 12 | 0.044902 |

$p_{\text{cum}} = 6.958\text{E-}44 < p_B$

“hc” re “K” – no

“All set of preparations” re “K”

| cm <sup>-1</sup> | RankSum  | RankSum  | U        | Z        | p-level  | Z        | p-level  | Valid N | Valid N | 2*1sided |
|------------------|----------|----------|----------|----------|----------|----------|----------|---------|---------|----------|
| 106.985          | 795.0000 | 381.0000 | 129.0000 | -2.07143 | 0.038320 | -2.07143 | 0.038320 | 36      | 12      | 0.038260 |
| 107.387          | 783.5000 | 392.5000 | 117.5000 | -2.34524 | 0.019016 | -2.34530 | 0.019012 | 36      | 12      | 0.017562 |
| 107.789          | 775.0000 | 401.0000 | 109.0000 | -2.54762 | 0.010847 | -2.54762 | 0.010847 | 36      | 12      | 0.009871 |
| 108.191          | 770.0000 | 406.0000 | 104.0000 | -2.66667 | 0.007661 | -2.66667 | 0.007661 | 36      | 12      | 0.006716 |
| 108.594          | 783.0000 | 393.0000 | 117.0000 | -2.35714 | 0.018417 | -2.35721 | 0.018414 | 36      | 12      | 0.017562 |
| 108.996          | 792.0000 | 384.0000 | 126.0000 | -2.14286 | 0.032125 | -2.14286 | 0.032125 | 36      | 12      | 0.031781 |

$p_{\text{cum}} = 8.264\text{E-}13 < p_B$

“All set of preparations” re “hc” – no.
