# Supplementary material for: Possible Effect of Human-Experimenter on Homeopathic-Like Aqueous Preparations
Source: MDPI journal article supplement (doi:10.3390/w13111475), 2021-05-24
Supplement: s1 [file s1]

**1. Automatically reported spectral parameters of dynamic light scattering, experiment 22.09.2017 (selected Size in limits of 40-1360 nm)**

| Sample No. | Preparation | % Intensity | Size, nm | St Dev (Size), nm |
|------------|-------------|-------------|----------|-------------------|
| 1          | hc          | 66.9        | 107      | 5.016             |
| 2          | ur          | 100         | 48.57    | 1.154             |
| 3          | csf         | 100         | 410.4    | 20.15             |
| 4          | hc          |             |          |                   |
| 5          | hc          | 100         | 143.1    | 4.713             |
| 6          | ur          | 93.5        | 78.82    | 2.88              |
| 7          | csf         |             |          |                   |
| 8          | lyd         | 48.2        | 151.7    | 10.32             |
| 9          | ur          |             |          |                   |
| 10         | lyd         |             |          |                   |
| 11         | csf         | 62.4        | 303.5    | 25.20             |
| 12         | lyd         | 22.2        | 135.3    | 6.527             |
| 13         | ur          | 22.5        | 271      | 26.23             |
| 14         | ur          | 18.2        | 103.6    | 13.92             |
| 15         | hc          | 25.6        | 228.9    | 20.24             |
| 16         | lyd         | 27.4        | 574.1    | 48.68             |
| 17         | hc          | 100         | 41.9     |                   |
| 18         | lyd         | 31.2        | 1360     | 112.2             |
| 19         | lyd         |             |          |                   |
| 20         | ur          | 24.7        | 250.4    | 10.74             |
| 21         | ur          |             |          |                   |
| 22         | ur          | 23.6        | 184.4    | 18.23             |
| 23         | csf         | 28.3        | 154.3    | 6.875             |
| 24         | ur          | 100         | 101.6    | 0                 |
| 25         | ur          |             |          |                   |
| 26         | lyd         |             |          |                   |
| 27         | hc          | 64.8        | 545      | 43.04             |
| 28         | csf         |             |          |                   |
| 29         | lyd         | 30.4        | 294.4    | 29.01             |
| 30         | hc          |             |          |                   |
| 31         | ur          | 17.3        | 227.8    | 11.6              |
| 32         | hc          | 100         | 185.2    | 9.249             |
| 33         | csf         |             |          |                   |
| 34         | lyd         |             |          |                   |
| 35         | csf         | 35.5        | 783.5    | 63.83             |
| 36         | csf         | 100         | 112.5    | 4.041             |
| 37         | hc          |             |          |                   |
| 38         | csf         |             |          |                   |
| 39         | csf         |             |          |                   |
| 40         | hc          | 6.6         | 77.41    | 2.535             |
| 41         | csf         | 44.8        | 943.9    | 88.46             |
| 42         | csf         | 16.9        | 176.8    | 17.01             |

|    |     |      |       |          |
|----|-----|------|-------|----------|
| 43 | lyd | 7.2  | 53.8  | 4.42     |
| 44 | hc  | 100  | 478.9 | 29.3     |
| 45 | ur  |      |       |          |
| 46 | lyd | 19.9 | 244.2 | 25.18    |
| 47 | lyd | 12.8 | 158.2 | 30.35    |
| 48 | ur  |      |       |          |
| 49 | hc  |      |       |          |
| 50 | ur  | 13   | 118   | 6.272    |
| 51 | lyd | 38.3 | 314.2 | 33.5     |
| 52 | csf | 18   | 127.1 | 6.582    |
| 53 | hc  |      |       |          |
| 54 | lyd | 18.7 | 309.3 | 27.05    |
| 55 | csf | 100  | 56.7  | 0        |
| 56 | lyd | 47.3 | 1062  | 53.29    |
| 57 | ur  |      |       |          |
| 58 | hc  | 100  | 251.9 | 9.166    |
| 59 | csf |      |       |          |
| 60 | hc  | 100  | 226.3 | 0.000003 |

Note:

Yellow marks – samples excluded due to an absence of refraction peaks or Size lying out of accepted limits 40-1360 nm.

## 2. Results of statistical analysis of distinctions between preparations by means of Mann-Whitney U-test

“hc” *re* “ur”

|                   | Rank Sum | Rank Sum | U  | Z        | p-level  | Z        | p-level  | Valid N | Valid N | 2*1sided |
|-------------------|----------|----------|----|----------|----------|----------|----------|---------|---------|----------|
| % Intensity       | 121      | 69       | 24 | 1.714643 | 0.086412 | 1.781534 | 0.074826 | 10      | 9       | 0.094720 |
| Size, nm          | 110      | 80       | 35 | 0.816497 | 0.414217 | 0.816497 | 0.414217 | 10      | 9       | 0.446968 |
| St Dev (Size), nm | 88       | 83       | 38 | 0.220755 | 0.825283 | 0.220755 | 0.825283 | 9       | 9       | 0.863307 |

“hc” *re* “csf”

|                   | Rank Sum | Rank Sum | U  | Z         | p-level  | Z         | p-level  | Valid N | Valid N | 2*1sided |
|-------------------|----------|----------|----|-----------|----------|-----------|----------|---------|---------|----------|
| % Intensity       | 114      | 76       | 31 | 1.143095  | 0.253000 | 1.208467  | 0.226869 | 10      | 9       | 0.277512 |
| Size, nm          | 94       | 96       | 39 | -0.489898 | 0.624206 | -0.489898 | 0.624206 | 10      | 9       | 0.660720 |
| St Dev (Size), nm | 79       | 92       | 34 | -0.573964 | 0.565993 | -0.573964 | 0.565993 | 9       | 9       | 0.604813 |

“hc” *re* “lyd”

|                   | Rank Sum | Rank Sum | U  | Z        | p-level  | Z        | p-level  | Valid N | Valid N | 2*1sided |
|-------------------|----------|----------|----|----------|----------|----------|----------|---------|---------|----------|
| % Intensity       | 148      | 83       | 17 | 2.67588  | 0.007454 | 2.70682  | 0.006794 | 10      | 11      | 0.006192 |
| Size, nm          | 92       | 139      | 37 | -1.26752 | 0.204970 | -1.26752 | 0.204970 | 10      | 11      | 0.223024 |
| St Dev (Size), nm | 68       | 142      | 23 | -2.01330 | 0.044084 | -2.01330 | 0.044084 | 9       | 11      | 0.046452 |

Red text –  $p < p_B = 0.0125$
