# Supplementary material for: Possible Effect of Human-Experimenter on Homeopathic-Like Aqueous Preparations
Source: MDPI journal article supplement (doi:10.3390/w13111475), 2021-05-24
Supplement: s1 [file s1]

**1. Automatically reported spectral parameters of dynamic light scattering, experiment 22.11.2017 (selected Size in limits of 7-1369 nm)**

| Sample No. | Preparation | % Intensity | Size, nm | St Dev (Size), nm |
|------------|-------------|-------------|----------|-------------------|
| 1          | lyd         |             |          |                   |
| 2          | hc          | 57.1        | 331      | 35.99             |
| 3          | euf         |             |          |                   |
| 4          | hc          |             |          |                   |
| 5          | euf         |             |          |                   |
| 6          | anlg        | 14.3        | 250.4    | 18.76             |
| 7          | hc          | 18.1        | 295.8    | 35.52             |
| 8          | anlg        | 100         | 21.48    | 0.7273            |
| 9          | anlg        |             |          |                   |
| 10         | euf         | 100         | 56.7     | 0                 |
| 11         | hc          |             |          |                   |
| 12         | euf         |             |          |                   |
| 13         | anlg        | 100         | 364.5    | 22.07             |
| 14         | hc          |             |          |                   |
| 15         | euf         | 100         | 141.6    | 5.11              |
| 16         | lyd         |             |          |                   |
| 17         | lyd         |             |          |                   |
| 18         | anlg        |             |          |                   |
| 19         | anlg        | 100         | 9.389    | 0.3205            |
| 20         | hc          |             |          |                   |
| 21         | lyd         |             |          |                   |
| 22         | euf         |             |          |                   |
| 23         | anlg        | 8.1         | 56.38    | 6.514             |
| 24         | hc          | 12.8        | 54.87    | 3.746             |
| 25         | euf         | 74.3        | 1369     | 107.7             |
| 26         | euf         | 75.4        | 233.2    | 17.4              |
| 27         | hc          |             |          |                   |
| 28         | lyd         | 42.7        | 568.2    | 81.05             |
| 29         | lyd         | 37.9        | 1179     | 198.6             |
| 30         | anlg        | 100         | 136.8    | 5.85              |
| 31         | lyd         | 100         | 49.18    | 0.773             |
| 32         | hc          |             |          |                   |
| 33         | lyd         | 29.3        | 471.6    | 58.03             |
| 34         | euf         | 100         | 136      | 0.8605            |
| 35         | anlg        |             |          |                   |
| 36         | euf         | 18          | 354.4    | 35.91             |
| 37         | lyd         | 100         | 11.14    | 0.3825            |
| 38         | euf         |             |          |                   |
| 39         | anlg        |             |          |                   |
| 40         | euf         |             |          |                   |
| 41         | lyd         | 100         | 619.7    | 30.62             |
| 42         | euf         | 100         | 395.8    | 13.47             |
| 43         | lyd         | 100         | 51.73    | 2.507             |

|    |      |      |       |        |
|----|------|------|-------|--------|
| 44 | anlg | 19   | 146   | 7.812  |
| 45 | hc   | 100  | 129.2 | 4.373  |
| 46 | lyd  | 100  | 12.28 | 0      |
| 47 | lyd  | 47.2 | 286.5 | 17.8   |
| 48 | anlg |      |       |        |
| 49 | euf  |      |       |        |
| 50 | hc   | 86.7 | 7.072 | 0.2556 |
| 51 | anlg | 100  | 248   | 7.978  |
| 52 | hc   | 94.3 | 118.9 | 7.56   |
| 53 | hc   |      |       |        |
| 54 | anlg | 100  | 155.3 | 7.987  |
| 55 | anlg |      |       |        |
| 56 | lyd  | 26.2 | 518.5 | 48.33  |
| 57 | hc   |      |       |        |
| 58 | hc   | 100  | 30.98 | 1.021  |
| 59 | euf  |      |       |        |
| 60 | lyd  | 5.8  | 244.6 | 19.54  |
| K  | K    |      |       |        |
| K  | K    | 90   | 187.2 | 7.129  |
| K  | K    | 100  | 71.28 | 1.832  |
| K  | K    | 56.2 | 593.1 | 87.2   |
| K  | K    | 53.3 | 490.9 | 64.17  |
| K  | K    | 59.9 | 579.1 | 79.67  |
| K  | K    | 100  | 285.3 | 12.59  |
| K  | K    | 100  | 164.6 | 5.768  |
| K  | K    | 62.4 | 523.8 | 36.67  |
| K  | K    | 53.1 | 650.6 | 71.83  |
| K  | K    | 72.2 | 483.8 | 34.15  |
| K  | K    | 63.8 | 696.7 | 67.97  |
| K  | K    | 40.1 | 531   | 69.35  |
| K  | K    | 61.5 | 860.4 | 118.8  |
| K  | K    | 58.9 | 792.4 | 105.4  |
| K  | K    | 96   | 1366  | 344.8  |
| K  | K    | 83.3 | 906.2 | 163.1  |
| K  | K    | 63.4 | 629.2 | 65.92  |
| K  | K    | 64.5 | 520.4 | 47.59  |
| K  | K    | 53.1 | 778.6 | 106.2  |

Notes:

Yellow marks – samples excluded due to an absence of refraction peaks or Size lying out of accepted limits 7-1369 nm.

Cyan mark – the lost sample.

## 2. Results of statistical analysis of distinctions between preparations by means of Mann-Whitney U-test

“hc” vs “lyd”

|                   | Rank Sum | Rank Sum | U  | Z        | p-level  | Z        | p-level  | Valid N | Valid N | 2*1sided |
|-------------------|----------|----------|----|----------|----------|----------|----------|---------|---------|----------|
| % Intensity       | 65       | 106      | 37 | -0.13585 | 0.891940 | -0.13995 | 0.888696 | 7       | 11      | 0.929801 |
| Size, nm          | 54       | 117      | 26 | -1.13208 | 0.257600 | -1.13208 | 0.257600 | 7       | 11      | 0.285445 |
| St Dev (Size), nm | 58       | 113      | 30 | -0.76982 | 0.441409 | -0.76982 | 0.441409 | 7       | 11      | 0.478947 |

“hc” vs “euf”

|                   | Rank Sum | Rank Sum | U  | Z        | p-level  | Z        | p-level  | Valid N | Valid N | 2*1sided |
|-------------------|----------|----------|----|----------|----------|----------|----------|---------|---------|----------|
| % Intensity       | 46       | 59       | 18 | -0.83054 | 0.406234 | -0.86445 | 0.387340 | 7       | 7       | 0.455711 |
| Size, nm          | 38       | 67       | 10 | -1.85274 | 0.063920 | -1.85274 | 0.063920 | 7       | 7       | 0.072844 |
| St Dev (Size), nm | 49       | 56       | 21 | -0.44721 | 0.654721 | -0.44721 | 0.654721 | 7       | 7       | 0.710373 |

“hc” vs “anlg”

|                   | Rank Sum | Rank Sum | U  | Z        | p-level  | Z        | p-level  | Valid N | Valid N | 2*1sided |
|-------------------|----------|----------|----|----------|----------|----------|----------|---------|---------|----------|
| % Intensity       | 52       | 84       | 24 | -0.79388 | 0.427263 | -0.84799 | 0.396447 | 7       | 9       | 0.469755 |
| Size, nm          | 54       | 82       | 26 | -0.58218 | 0.560445 | -0.58218 | 0.560445 | 7       | 9       | 0.606469 |
| St Dev (Size), nm | 56       | 80       | 28 | -0.37048 | 0.711026 | -0.37048 | 0.711026 | 7       | 9       | 0.757692 |

“K” re “lyd”

|                   | Rank Sum | Rank Sum | U    | Z        | p-level  | Z        | p-level  | Valid N | Valid N | 2*1sided |
|-------------------|----------|----------|------|----------|----------|----------|----------|---------|---------|----------|
| % Intensity       | 309      | 155.5    | 89.5 | 0.645547 | 0.518573 | 0.651739 | 0.514570 | 19      | 11      | 0.524675 |
| Size, nm          | 344      | 121      | 55   | 2.130305 | 0.033147 | 2.130305 | 0.033147 | 19      | 11      | 0.033364 |
| St Dev (Size), nm | 341      | 124      | 58   | 2.001196 | 0.045372 | 2.001196 | 0.045372 | 19      | 11      | 0.046502 |

“K” re “euf”

|                   | Rank Sum | Rank Sum | U  | Z        | p-level  | Z        | p-level  | Valid N | Valid N | 2*1sided |
|-------------------|----------|----------|----|----------|----------|----------|----------|---------|---------|----------|
| % Intensity       | 227      | 124      | 37 | -1.70532 | 0.088136 | -1.72218 | 0.085038 | 19      | 7       | 0.094199 |
| Size, nm          | 291      | 60       | 32 | 1.99435  | 0.046114 | 1.99435  | 0.046114 | 19      | 7       | 0.047622 |
| St Dev (Size), nm | 293      | 58       | 30 | 2.10997  | 0.034862 | 2.10997  | 0.034862 | 19      | 7       | 0.035166 |

“K” re “anlg”

|                   | Rank Sum | Rank Sum | U  | Z         | p-level  | Z         | p-level  | Valid N | Valid N | 2*1sided |
|-------------------|----------|----------|----|-----------|----------|-----------|----------|---------|---------|----------|
| % Intensity       | 256      | 150      | 66 | -0.959242 | 0.337438 | -0.975530 | 0.329298 | 19      | 9       | 0.356803 |
| Size, nm          | 348      | 58       | 13 | 3.566413  | 0.000362 | 3.566413  | 0.000362 | 19      | 9       | 0.000104 |
| St Dev (Size), nm | 340      | 66       | 21 | 3.172877  | 0.001510 | 3.172877  | 0.001510 | 19      | 9       | 0.000836 |

“K” re “hc”

|                   | Rank Sum | Rank Sum | U  | Z         | p-level  | Z         | p-level  | Valid N | Valid N | 2*1sided |
|-------------------|----------|----------|----|-----------|----------|-----------|----------|---------|---------|----------|
| % Intensity       | 254      | 97       | 64 | -0.144518 | 0.885091 | -0.145040 | 0.884679 | 19      | 7       | 0.910143 |
| Size, nm          | 313      | 38       | 10 | 3.266114  | 0.001090 | 3.266114  | 0.001090 | 19      | 7       | 0.000401 |
| St Dev (Size), nm | 308      | 43       | 15 | 2.977078  | 0.002910 | 2.977078  | 0.002910 | 19      | 7       | 0.001715 |

Red text –  $p < p_B = 0.0125$
