# Supplementary material for: Possible Effect of Human-Experimenter on Homeopathic-Like Aqueous Preparations
Source: MDPI journal article supplement (doi:10.3390/w13111475), 2021-05-24
Supplement: s1 [file s1]

## **Supplementary Materials (description of files)**

**S1\_1\_08092016\_File.xls File. Dependence of far infrared transmission coefficients (T%) on wavelength in the experiment date 08.09.2016.** WL<sub>cm-1</sub> – wavelength in cm<sup>-1</sup>; WL<sub>nm</sub> – wavelength in nm; hgch, veb, hc, lyd, veb, hypl, all – studied preparations; 1, ....., 90 – numbers on containers with samples.

**S1\_1\_15032017\_File.xls File. Dependence of far infrared transmission coefficients (T%) on wavelength in the experiment date 15.03.2017.** WL<sub>cm-1</sub> – wavelength in cm<sup>-1</sup>; hgch, veb, hc, lyd, veb, hypl, all, K – studied preparations; 1, ....., 100 – numbers on containers with samples.

**S1\_1\_24052017\_File.xls File. Dependence of far infrared transmission coefficients (T%) on wavelength in the experiment date 24.05.2017.** WL<sub>cm-1</sub> – wavelength in cm<sup>-1</sup>; hgch, veb, hc, lyd, veb, hypl, all – studied preparations; 1, ....., 90 – numbers on containers with samples.

**S1\_2\_08092016\_File.xls File. Results of comparative analysis of spectral files by means of Mann-Whitney test with Bonferroni's multiple comparison correction in accordance with Eq.1 for the experiment date 08.09.2016.** cm-1 - wavelength in cm<sup>-1</sup>; nm - wavelength in nm; Rank Sum – sum of ranks; U – number of inversions; Z – Z-distribution approximating Mann-Whitney statistics; p-level – statistical significance; Valid N – number of samples; 2\*1sided – 2-sided statistical significance; p<sub>cum</sub> – cumulative statistical significance satisfying Eq.1; hgch, veb, hc, lyd, veb, hypl, all – studied preparations.

**S1\_2\_15032017\_File.xls File. Results of comparative analysis of spectral files by means of Mann-Whitney test with Bonferroni's multiple comparison correction in accordance with Eq.1 for the experiment date 15.03.2017.** cm-1 - wavelength in cm<sup>-1</sup>; nm - wavelength in nm; eV – wavelength in eV; Rank Sum – sum of ranks; U – number of inversions; Z – Z-distribution approximating Mann-Whitney statistics; p-level – statistical significance; Valid N – number of samples; 2\*1sided – 2-sided statistical significance; p<sub>cum</sub> – cumulative statistical significance satisfying Eq.1; hgch, veb, hc, lyd, veb, hypl, all, K – studied preparations.

**S1\_2\_24052017\_File.xls File. Results of comparative analysis of spectral files by means of Mann-Whitney test with Bonferroni's multiple comparison correction in accordance with Eq.1 for the experiment date 15.03.2017.** cm-1 - wavelength in cm<sup>-1</sup>; nm - wavelength in nm; eV – wavelength in eV; Rank Sum – sum of ranks; U – number

of inversions;  $Z$  – Z-distribution approximating Mann-Whitney statistics; p-level – statistical significance; Valid N – number of samples; 2\*1sided – 2-sided statistical significance;  $p_{cum}$  – cumulative statistical significance satisfying Eq.1; hgch, veb, hc, lyd, veb, hypl, all – studied preparations.

**S2\_1\_02042018\_File.xls File. Dependence of terahertz transmission and refractive indexes on wavelength in the experiment date 02.04.2018.** WL<sub>cm-1</sub> – wavelength in cm<sup>-1</sup>; LYD, HC, EUF, ANLG – studied preparations; 1, ....., 24 – numbers on containers with samples.

**S2\_1\_24052018\_File.xls File. Dependence of terahertz transmission and refractive indexes on wavelength in the experiment date 24.05.2018.** WL<sub>cm-1</sub> – wavelength in cm<sup>-1</sup>; LYD, HC, EUF, ANLG, K – studied preparations; 1, ....., 60 – numbers on containers with samples.

**S2\_1\_25122018\_File.xls File. Dependence of terahertz transmission and refractive indexes on wavelength in the experiment date 02.04.2018.** WL<sub>cm-1</sub> – wavelength in cm<sup>-1</sup>; LYD, EUF, ANLG, K – studied preparations; 1, ....., 60 – numbers on containers with samples.

**S2\_2\_02042018\_File.xls File. Results of comparative analysis of terahertz transmission and refractive indexes by means of Mann-Whitney test with Bonferroni's multiple comparison correction in accordance with Eq.1 for the experiment date 02.04.2018.** WL, cm-1 - wavelength in cm<sup>-1</sup>; Rank Sum – sum of ranks; U – number of inversions;  $Z$  – Z-distribution approximating Mann-Whitney statistics; p-level – statistical significance; Valid N – number of samples; 2\*1sided – 2-sided statistical significance;  $p_{cum}$  – cumulative statistical significance satisfying Eq.1; hc, all set of preparations – studied preparations.

**S2\_2\_24052018\_File.pdf File. Results of comparative analysis of terahertz transmission and refractive indexes by means of Mann-Whitney test with Bonferroni's multiple comparison correction in accordance with Eq.1 for the experiment date 24.05.2018.** cm-1 - wavelength in cm<sup>-1</sup>; Rank Sum – sum of ranks; U – number of inversions;  $Z$  – Z-distribution approximating Mann-Whitney statistics; p-level – statistical significance; Valid N – number of samples; 2\*1sided – 2-sided statistical significance;  $p_{cum}$  – cumulative statistical significance satisfying Eq.1; "hc", "lyd", "euf", "anlg", "hc", "K" – studied preparations; no – non significant distinctions; re – in relation to.

**S2\_2\_25122018\_File.pdf** File. Results of comparative analysis of terahertz transmission and refractive indexes by means of Mann-Whitney test with Bonferroni's multiple comparison correction in accordance with Eq.1 for the experiment date 25.12.2018.  $\text{cm}^{-1}$  - wavelength in  $\text{cm}^{-1}$ ; Rank Sum – sum of ranks; U – number of inversions; Z – Z-distribution approximating Mann-Whitney statistics; p-level – statistical significance; Valid N – number of samples; 2\*1sided – 2-sided statistical significance;  $p_{\text{cum}}$  – cumulative statistical significance satisfying Eq.1; “all set of preparations”, “lyd”, “euf”, “anlg”, “hc”, “K” – studied preparations; no – non significant distinctions; *re* – in relation to.

**S3\_03022018\_File.pdf** File. Spectral parameters of dynamic light scattering and results of comparative analysis of spectral parameters by means of Mann-Whitney test for the experiment date 03.02.2018. % Intensity, Size, nm, St Dev (Size), nm – estimated spectral parameters; Rank Sum – sum of ranks; U – number of inversions; Z – Z-distribution approximating Mann-Whitney statistics; p-level – statistical significance; Valid N – number of samples; 2\*1sided – 2-sided statistical significance;  $p_{\text{cum}}$  – cumulative statistical significance satisfying Eq.1; “hc”, “lyd”, “euf”, “anlg”, “K” – studied preparations; *re* – in relation to.

**S3\_22092017\_File.pdf** File. Spectral parameters of dynamic light scattering and results of comparative analysis of spectral parameters by means of Mann-Whitney test for the experiment date 22.09.2017. % Intensity, Size, nm, St Dev (Size), nm – estimated spectral parameters; Rank Sum – sum of ranks; U – number of inversions; Z – Z-distribution approximating Mann-Whitney statistics; p-level – statistical significance; Valid N – number of samples; 2\*1sided – 2-sided statistical significance;  $p_{\text{cum}}$  – cumulative statistical significance satisfying Eq.1; “hc”, “csf”, “ur”, “lyd” – studied preparations; *re* – in relation to.

**S3\_22112017\_File.pdf** File. Spectral parameters of dynamic light scattering and results of comparative analysis of spectral parameters by means of Mann-Whitney test for the experiment date 22.11.2017. % Intensity, Size, nm, St Dev (Size), nm – estimated spectral parameters; Rank Sum – sum of ranks; U – number of inversions; Z – Z-distribution approximating Mann-Whitney statistics; p-level – statistical significance; Valid N – number of samples; 2\*1sided – 2-sided statistical significance;  $p_{\text{cum}}$  – cumulative statistical significance satisfying Eq.1; “hc”, “lyd”, “euf”, “anlg”, “K” – studied preparations; *re* – in relation to.
